# Supplementary material for: Transfer learning based on dynamic time warping algorithms to improve qualitative analysis and quantitative prediction of rocks over multiple LIBS instruments
Source: Royal Society of Chemistry journal article supplement (doi:10.1039/d2ja00370h), 2023-01-01
Supplement: d2ja00370h1.pdf [file d2ja00370h1.pdf]

## Supplementary information

# Transfer learning based on dynamic time warping algorithms to improve qualitative analysis and quantitative prediction of rocks over multiple LIBS instruments

Yu Rao,<sup>a,b</sup> Lingwei Zeng,<sup>a</sup> Mengfan Wu,<sup>a</sup> Weiheng Kong,<sup>a</sup> Wenxin Ren,<sup>a</sup> Sha Chen,<sup>a</sup> Qinwen Fan,<sup>a</sup> Yixiang Duan,<sup>a</sup> Xu Wang<sup>1,a</sup> and Jie Wang<sup>2,b</sup>

<sup>a</sup> *Research Center of Analytical Instrumentation, School of Mechanical Engineering, Sichuan University, Chengdu 610065, China*

<sup>b</sup> *School of Mechanical Engineering, Sichuan University, Chengdu 610065, China*

---

<sup>1,2</sup> Corresponding author.

E-mail address: wangxu028@scu.edu.cn (Xu Wang), wangjie@scu.edu.cn (Jie Wang).

## Table of Contents

|                                                                                                                                          |             |
|------------------------------------------------------------------------------------------------------------------------------------------|-------------|
| <b>Table S1. The elemental content of all samples .....</b>                                                                              | <b>S-3</b>  |
| <b>Figure S1. Spectral serial and mapping relationship .....</b>                                                                         | <b>S-5</b>  |
| <b>Figure S2. The best route calculation by DTW.....</b>                                                                                 | <b>S-6</b>  |
| <b>Figure S3. The comparison of the spectral correction rates before and after pre-treatment .....</b>                                   | <b>S-8</b>  |
| <b>Figure S4. The parameter optimization process of PDS algorithm .....</b>                                                              | <b>S-9</b>  |
| <b>Figure S5. The difference of average intensity between primary and secondary instruments before and after transfer learning .....</b> | <b>S-10</b> |
| <b>Figure S6. The selection features of the major elements.....</b>                                                                      | <b>S-12</b> |

**Table S1.** The elemental content of all samples. The content of Si, Al, Fe, Ca and Mg are high as major elements and Ti, Mn, K, Na and Ba are less as trace elements in the rocks. In this work, the main purpose is to validate the application of transfer learning in LIBS, therefore, only the major elements are considered in the subsequent experiments. The elemental content in the table is converted by the percentage of mass fraction.

| Samples      |                | Concentration (%) |        |        |        |        |       |       |       |       |       |
|--------------|----------------|-------------------|--------|--------|--------|--------|-------|-------|-------|-------|-------|
|              |                | Si                | Al     | Fe     | Ca     | Mg     | Ti    | Mn    | K     | Na    | Ba    |
| Dolomite     | GBW07114       | 0.289             | 0.053  | 0.028  | 21.443 | 13.080 | 0.009 | 0.008 | 0.032 | 0.022 | 0.004 |
|              | GBW07136       | 3.850             | 0.053  | 0.040  | 23.621 | 10.800 | 0.002 | 0.021 | 0.008 | 0.019 | 0.003 |
|              | GBW070157      | 3.929             | 0.635  | 0.333  | 20.521 | 11.856 | 0.022 | 0.015 | 0.032 | 0.024 | 0.288 |
|              | GBW070158      | 0.873             | 0.109  | 0.171  | 21.586 | 12.510 | 0.005 | 0.012 | 0.015 | 0.009 | 0.234 |
|              | GBW070159      | 1.008             | 0.132  | 0.174  | 21.536 | 12.546 | 0.007 | 0.012 | 0.022 | 0.008 | 0.223 |
|              | GBW070160      | 2.436             | 0.374  | 0.250  | 21.071 | 12.258 | 0.013 | 0.014 | 0.027 | 0.017 | 0.250 |
| Igneous rock | GBW07103       | 33.987            | 7.094  | 2.291  | 1.107  | 0.252  | 0.172 | 0.046 | 4.157 | 2.322 | 0.034 |
|              | GBW07104       | 28.289            | 8.561  | 5.289  | 3.714  | 1.032  | 0.309 | 0.060 | 1.568 | 2.864 | 0.102 |
|              | GBW07105       | 20.832            | 7.322  | 15.291 | 6.293  | 4.662  | 1.420 | 0.131 | 1.925 | 2.508 | 0.053 |
|              | GBW07109       | 25.424            | 9.381  | 5.185  | 0.993  | 0.390  | 0.288 | 0.093 | 6.207 | 5.312 | 0.025 |
|              | GBW07110       | 29.428            | 8.524  | 3.305  | 1.764  | 0.504  | 0.480 | 0.069 | 4.290 | 2.270 | 0.105 |
|              | GBW07111       | 27.851            | 8.767  | 4.244  | 3.371  | 1.686  | 0.462 | 0.073 | 2.904 | 3.005 | 0.190 |
|              | GBW07112       | 16.655            | 7.486  | 17.321 | 7.043  | 3.150  | 4.614 | 0.150 | 0.124 | 1.565 | 0.009 |
|              | GBW07113       | 33.964            | 6.861  | 2.245  | 0.421  | 0.096  | 0.180 | 0.108 | 4.506 | 1.907 | 0.051 |
|              | GBW07121       | 30.926            | 8.645  | 3.428  | 1.900  | 0.978  | 0.18  | 0.043 | 2.157 | 3.932 | 0.114 |
|              | GBW07122       | 23.156            | 7.285  | 18.760 | 6.857  | 4.320  | 0.551 | 0.160 | 0.398 | 1.536 | 0.062 |
| Mudstone     | GBW03101a      | 23.324            | 13.908 | 7.385  | 0.093  | 0.276  | 0.420 | 0.040 | 0.656 | 0.045 | --    |
|              | GBW03102a      | 25.046            | 16.581 | 0.231  | 1.286  | 0.050  | 0.018 | 0.015 | 0.954 | 1.892 | --    |
|              | GBW03103       | 31.099            | 7.031  | 3.870  | 2.307  | 1.104  | 0.396 | 0.068 | 2.074 | 1.343 | --    |
|              | GBW03104       | 32.494            | 7.846  | 3.969  | 0.157  | 0.402  | 0.408 | 0.019 | 3.120 | 0.148 | 0.040 |
|              | GBW03115       | 27.953            | 15.125 | 0.602  | 0.500  | 0.180  | 0.726 | --    | 1.278 | 1.291 | --    |
|              | GBWE0701<br>46 | 21.126            | 7.264  | 3.388  | 6.986  | 1.044  | 0.331 | 0.185 | 3.568 | 0.190 | --    |
|              | GBW07107       | 27.641            | 9.964  | 5.320  | 0.429  | 1.206  | 0.395 | 0.017 | 3.452 | 0.260 | 0.045 |
| Gypsum       | GBW03109       | 0.784             | 0.180  | 0.112  | 28.029 | 1.044  | 0.010 | --    | 0.078 | 0.048 | --    |
|              | GBW03111a      | 0.294             | 0.074  | 0.077  | 23.071 | 1.482  | 0.006 | --    | 0.022 | 0.010 | 0.001 |
| Limestone    | GBW03105a      | 0.509             | 0.127  | 0.077  | 38.593 | 0.486  | 0.006 | 0.005 | 0.070 | 0.013 | 0.001 |
|              | GBW03106a      | 0.975             | 0.175  | 0.119  | 36.864 | 1.350  | 0.009 | 0.007 | 0.141 | 0.013 | 0.003 |
|              | GBW03107a      | 1.890             | 0.498  | 0.406  | 35.779 | 1.074  | 0.031 | 0.011 | 0.349 | 0.020 | 0.003 |
|              | GBW03108a      | 1.050             | 0.318  | 0.266  | 33.621 | 3.486  | 0.018 | 0.009 | 0.166 | 0.012 | 0.002 |
|              | GBWE0701<br>47 | 1.129             | 0.198  | 0.175  | 33.364 | 3.930  | 0.014 | 0.004 | 0.041 | 0.008 | 0.001 |
|              | GBWE0701<br>48 | 1.097             | 0.287  | 0.292  | 29.864 | 6.222  | 0.019 | 0.005 | 0.061 | 0.008 | 0.001 |
|              | GBWE0701<br>49 | 1.409             | 0.329  | 0.202  | 36.15  | 1.728  | 0.019 | 0.004 | 0.136 | 0.019 | 0.002 |

|           |                |        |       |       |        |       |       |       |       |       |       |
|-----------|----------------|--------|-------|-------|--------|-------|-------|-------|-------|-------|-------|
|           | GBWE0701<br>50 | 2.147  | 0.150 | 0.131 | 32.921 | 3.588 | 0.009 | 0.004 | 0.032 | 0.007 | 0.005 |
|           | GBWE0701<br>51 | 1.549  | 0.180 | 0.127 | 36.586 | 1.458 | 0.012 | 0.003 | 0.078 | 0.005 | 0.001 |
|           | GBWE0701<br>52 | 0.616  | 0.119 | 0.106 | 38.421 | 0.702 | 0.008 | 0.003 | 0.055 | 0.004 | 0.001 |
|           | GBWE0701<br>53 | 1.862  | 0.348 | 0.211 | 34.686 | 2.586 | 0.031 | 0.004 | 0.153 | 0.021 | 0.001 |
|           | GBWE0701<br>54 | 1.101  | 0.429 | 0.207 | 37.107 | 0.738 | 0.022 | 0.006 | 0.137 | 0.007 | 0.002 |
|           | GBWE0701<br>55 | 0.448  | 0.174 | 0.102 | 38.714 | 0.492 | 0.010 | 0.004 | 0.070 | 0.004 | 0.001 |
|           | GBWE0701<br>56 | 0.390  | 0.128 | 0.100 | 38.400 | 0.900 | 0.007 | 0.004 | 0.040 | 0.004 | 0.001 |
|           | GBW07108       | 7.280  | 2.663 | 3.040 | 25.479 | 3.114 | 0.196 | 0.043 | 0.647 | 0.059 | 0.012 |
|           | GBW07120       | 3.103  | 0.360 | 0.147 | 36.500 | 0.426 | 0.023 | 0.003 | 0.124 | 0.022 | 0.001 |
|           | GBW07127       | 0.257  | 0.090 | 0.252 | 34.207 | 4.056 | 0.007 | 0.007 | 0.036 | 0.016 | 0.001 |
|           | GBW07128       | 0.336  | 0.116 | 0.268 | 29.964 | 6.972 | 0.013 | 0.007 | 0.043 | 0.022 | 0.001 |
|           | GBW07129       | 0.140  | 0.079 | 0.054 | 39.636 | 0.144 | 0.004 | 0.023 | 0.010 | 0.010 | 0.001 |
|           | GBW07130       | 0.504  | 0.095 | 0.225 | 38.629 | 0.852 | 0.004 | 0.003 | 0.036 | 0.011 | --    |
| Sandstone | GBW03112       | 45.971 | 0.445 | 0.065 | 0.055  | 0.040 | 0.012 | 0.001 | 0.051 | 0.016 | 0.032 |
|           | GBW03113       | 44.679 | 1.249 | 0.147 | 0.121  | 0.059 | 0.022 | 0.003 | 0.556 | 0.185 | 0.055 |
|           | GBW03114       | 41.809 | 2.901 | 0.336 | 0.243  | 0.096 | 0.061 | 0.008 | 1.718 | 0.809 | 0.067 |
|           | GBW07106       | 42.168 | 1.864 | 2.254 | 0.214  | 0.049 | 0.158 | 0.016 | 0.539 | 0.045 | 0.014 |

Considering the LIBS spectral data as a time series, the DTW algorithm can be used to calculate the best relationship of spectral between the primary and the secondary instrument. Then, a transfer model is constructed according to this relationship, so that the same model can be shared among multi-instruments of LIBS.

In the first step, the relationship between the two serials is calculated. Set the primary instrument spectral series as  $M = \{M_i, i = 1, \dots, n\}$ , the secondary instrument spectral series as  $S = \{S_j, j = 1, \dots, k\}$ . The DTW algorithm optimally matches channels to each other by calculating the sum of minimum distance between the channels on the two serials. The serial and mapping relationships are shown in **Figure S1**. The correlation coefficient between the data of the  $i^{th}$  spectral channel of the primary instrument and the  $j^{th}$  spectral channel of the secondary instrument can be calculated by equation (1).

$$r(M, S) = \frac{Cov(M(:,i), S(:,j))}{\sqrt{Var(M(:,i))}\sqrt{Var(S(:,j))}} \quad (1)$$

Where  $Cov(M(:,i), S(:,j))$  is the covariance and  $Var$  is the variance between the two channels. Based on the correlation coefficients between the primary and secondary instruments, the related distances between the spectral series can be found as equation (2).

$$D(M(:,i), S(:,j)) = 1 - r(M, S) \quad (2)$$

Then a cost matrix  $C$  is constructed to store the related distances of each channel.

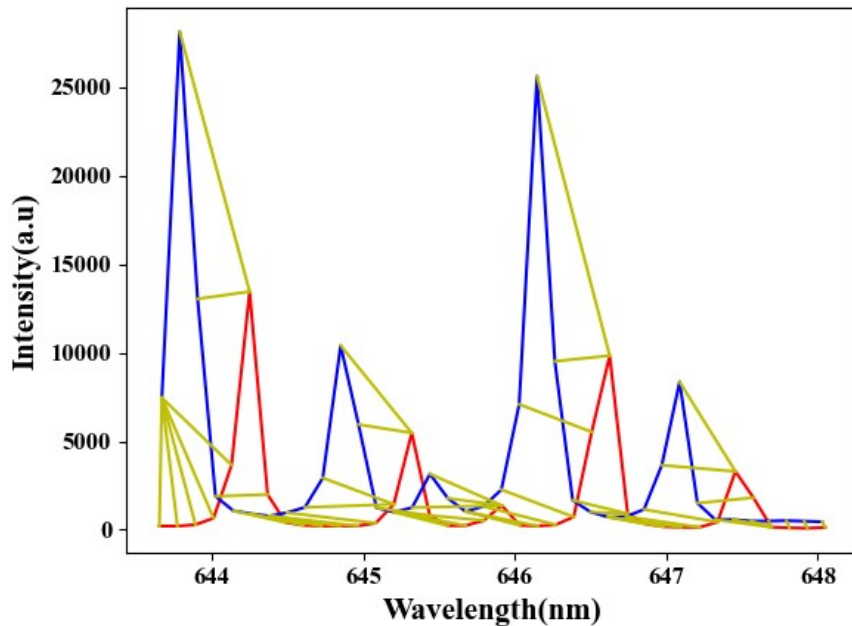

**Figure.S1** Spectral serial and mapping relationship

In the second step, optimal route mapping. With the cost matrix  $C$ , the DTW algorithm can find the related of minimum distance between each spectral channel on

the primary and the secondary instrument, which is the best correspondence between the two instruments. The route mapping must cover three conditions. Firstly, the route mapping is constrained by the boundary, which must start at point  $(1,1)$  and end at point  $(i,j)$ . Then, the route mapping is limited by the order and cannot skip or cross for matching. Finally, the route mapping is restricted by monotonicity to move only from the right or top or upper right side of a point to avoid entering a loop.

In the cost matrix  $C$ , suppose the current point is  $(i,j)$ , then the next point can only be compared among the three points  $(i+1,j), (i,j+1), (i+1,j+1)$ . The dynamic route mapping is used to solve for the route that sum of minimum distance in the whole spectral channel, and the calculation is shown in equation (3).

$$D_{min}(i,j) = \min \{D(i-1,j), D(i,j-1), D(i-1,j-1)\} + C(i,j) \quad (3)$$

where  $i, j$  are the maximum spectral channels of the primary and secondary instruments, respectively; the route that sum of minimum distance is the best correspondence.

As shown in **Figure S2**, if the optimal route is calculated directly for the full-spectrum channel, it needs to be calculated once for each point. In order to save computation time, in this experiment, the spectra are divided into three segments with 2048 channels in each segment and calculate the optimal dynamic time regularization route together. Compared with the direct calculation of the full spectrum channel, the calculation time is reduced by two-thirds.

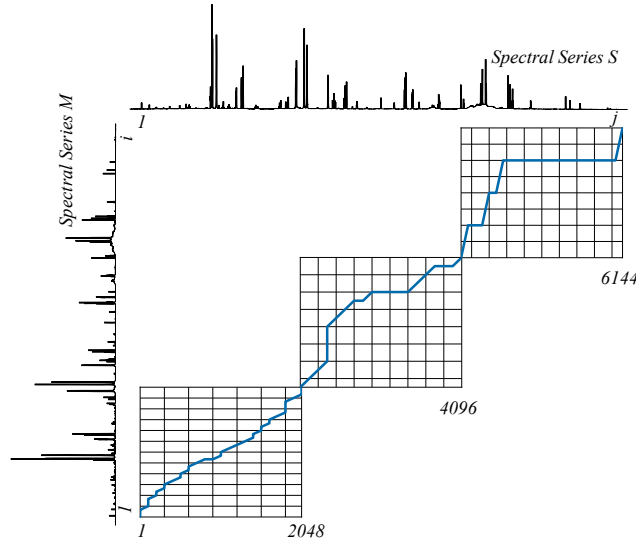

**Figure.S2** The best route calculation by DTW

Once we get the optimal correspondence, the third step, training the calibration model. The optimal correspondence for each channel between the primary and secondary instruments is obtained by DTW algorithm, and this correspondence includes one by one and one to many.

When the primary instrument  $M(:,i)$  corresponds one by one with the secondary instrument  $S(:,j)$ , the univariate regression model is constructed by Equation (4).

$$M(:,i) = a_0 + a_1 S(:,j) \quad (4)$$

When the primary instrument  $M(:,i)$  corresponds with the secondary instrument from  $S(:,j-k)$  to  $S(:,j+m)$ , the multivariate regression model is constructed by Equation (5).

$$M(:,i) = b_0 + b_1 S(:,j-k) + \dots + b_{k+m} S(:,j+m) \quad (5)$$

where a linear regression algorithm was used to calculate the equation coefficients for the univariate regression model and the PLS algorithm was used to calculate the equation coefficients for the multivariate regression model. The transfer model coefficient matrix  $F$  is obtained by calculating for the full spectral channel, then the relationship between the primary and secondary instrument spectra can be seen in equation (6).

$$M(:,i) = S(:,j) * F \quad (6)$$

It is necessary to make an accurate evaluation of the accuracy of the transfer model, a concept is introduced here called the correction rate of spectrum (TCRS). Where the average difference in spectra (ARMS) is calculated as:

$$ARMS = \frac{1}{m} \sum_{i=1}^m \sqrt{\frac{1}{k} \sum_{j=1}^k (M(:,j) - S(:,j))^2} \quad (7)$$

where  $k$  is the number of spectral channels and  $m$  is the number of samples,  $M(:,j)$  is the spectral intensity at the  $j^{th}$  channel of the primary instrument, and  $S(:,j)$  is the spectral intensity at the  $j^{th}$  channel of the secondary instrument. Then the TCRS can be calculated by Equation (8).

$$TCRS(\%) = \frac{ARMS_{uncorrected}^2 - ARMS_{corrected}^2}{ARMS_{uncorrected}^2} \times 100\% \quad (8)$$

Where  $ARMS_{uncorrected}^2$  is average difference in spectra between primary and secondary instrument before corrected,  $ARMS_{corrected}^2$  is average difference in spectra between primary and secondary instrument after corrected.

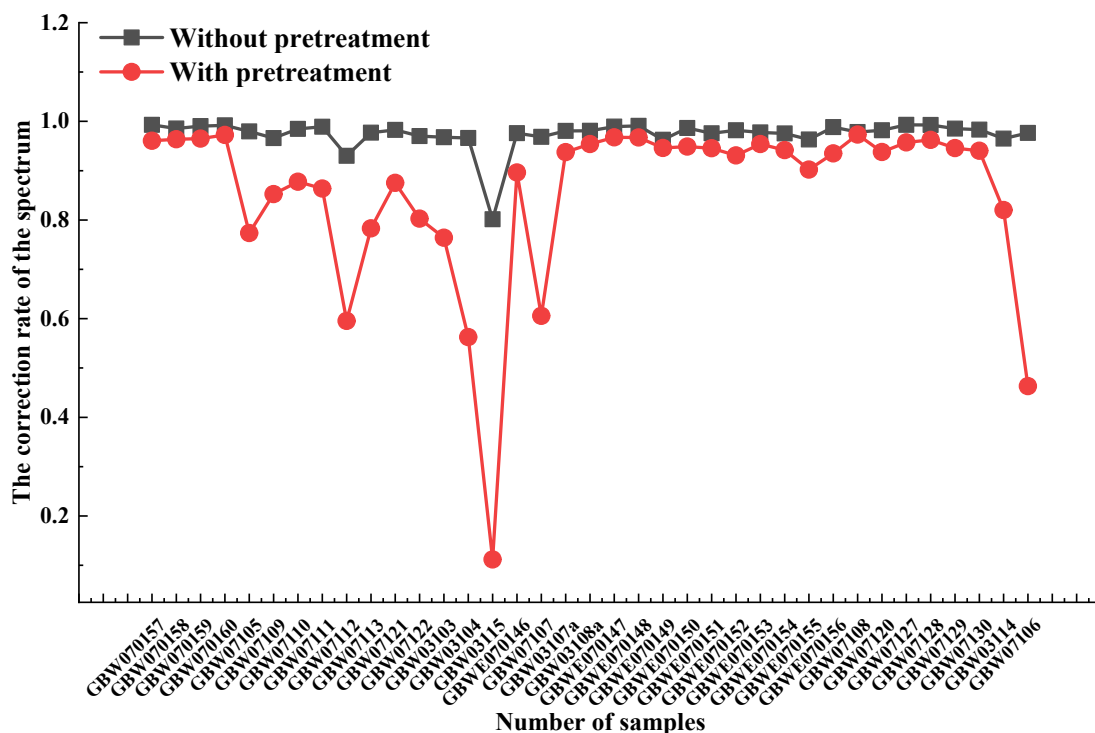

**Figure S3.** The comparison of the spectral correction rates before and after pre-treatment showed that the average correction rate of the spectra was 97.38% without pre-treatment, and 85.29% with pre-treatment. It may be that some information was lost in the small-scale spectra, which caused the spectrum correction was poor. Therefore, the spectral data without pretreatment were used in the subsequent experiments.





It is necessary to make an accurate evaluation of the accuracy of the transfer model, we have introduced a concept called spectral transfer error rate (STER). The smaller the value of STER, the smaller the difference between the two spectra collected from primary and secondary instrument. For the same batch of samples, set the spectral matrix collected by the primary instrument as  $\{M_{ij}, i=1, \dots, N; j=1, \dots, K\}$ , set the spectral matrix collected by the secondary instrument as  $\{S_{ij}, i=1, \dots, N; j=1, \dots, K\}$ , where N is the number of samples and K is the number of wavelength points.

The spectra transfer error rate for the  $i_{th}$  sample is calculated by the formula:

$$STER_i = \frac{\frac{1}{K} \sum_{j=1}^K |M_{ij} - S_{ij}|}{\frac{1}{K} \sum_{j=1}^K |Z_{ij}|} \quad (1)$$

Where,  $Z_{ij} = \frac{M_{ij} + S_{ij}}{2}$ ,  $j=1, \dots, K$  is the average spectrum of the  $i_{th}$  sample.

For the entire sample set of data  $i=1, \dots, N$  there are the average and maximum transfer error rates:

$$STER_{ave} = \frac{1}{N} \sum_{i=1}^N STER_i \quad (2)$$

$$STER_{max} = \max_i(STER_i) \quad (3)$$

The difference of their transfer error rates between half-width windows of 10 and 12 is not much, the spectral transfer error rate of average is 10.67% and 10.64%, the spectral transfer error rate of max is 25% and 24.91%, respectively. However, the calculation time of the half-width window of 12 is slower than that of the half-width window of 10, 36.68 seconds and 29.57 seconds, respectively, so the half-width window of 10 is chosen.

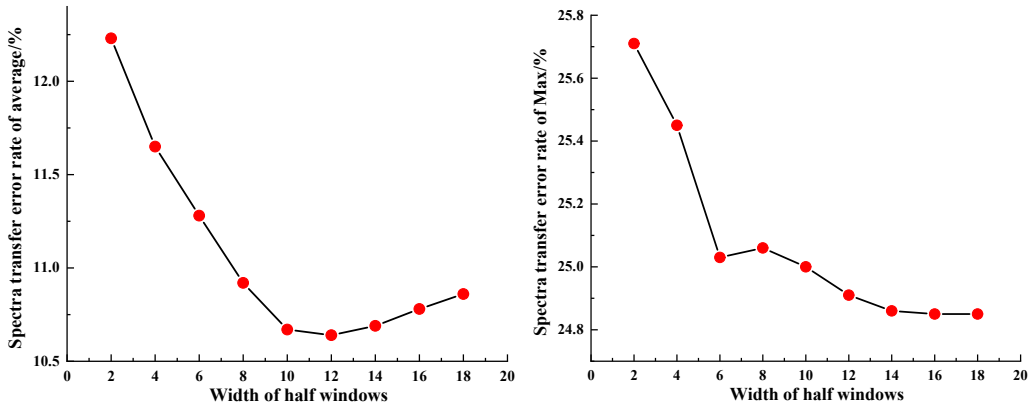

**Figure S4.** The parameter optimization process of PDS algorithm

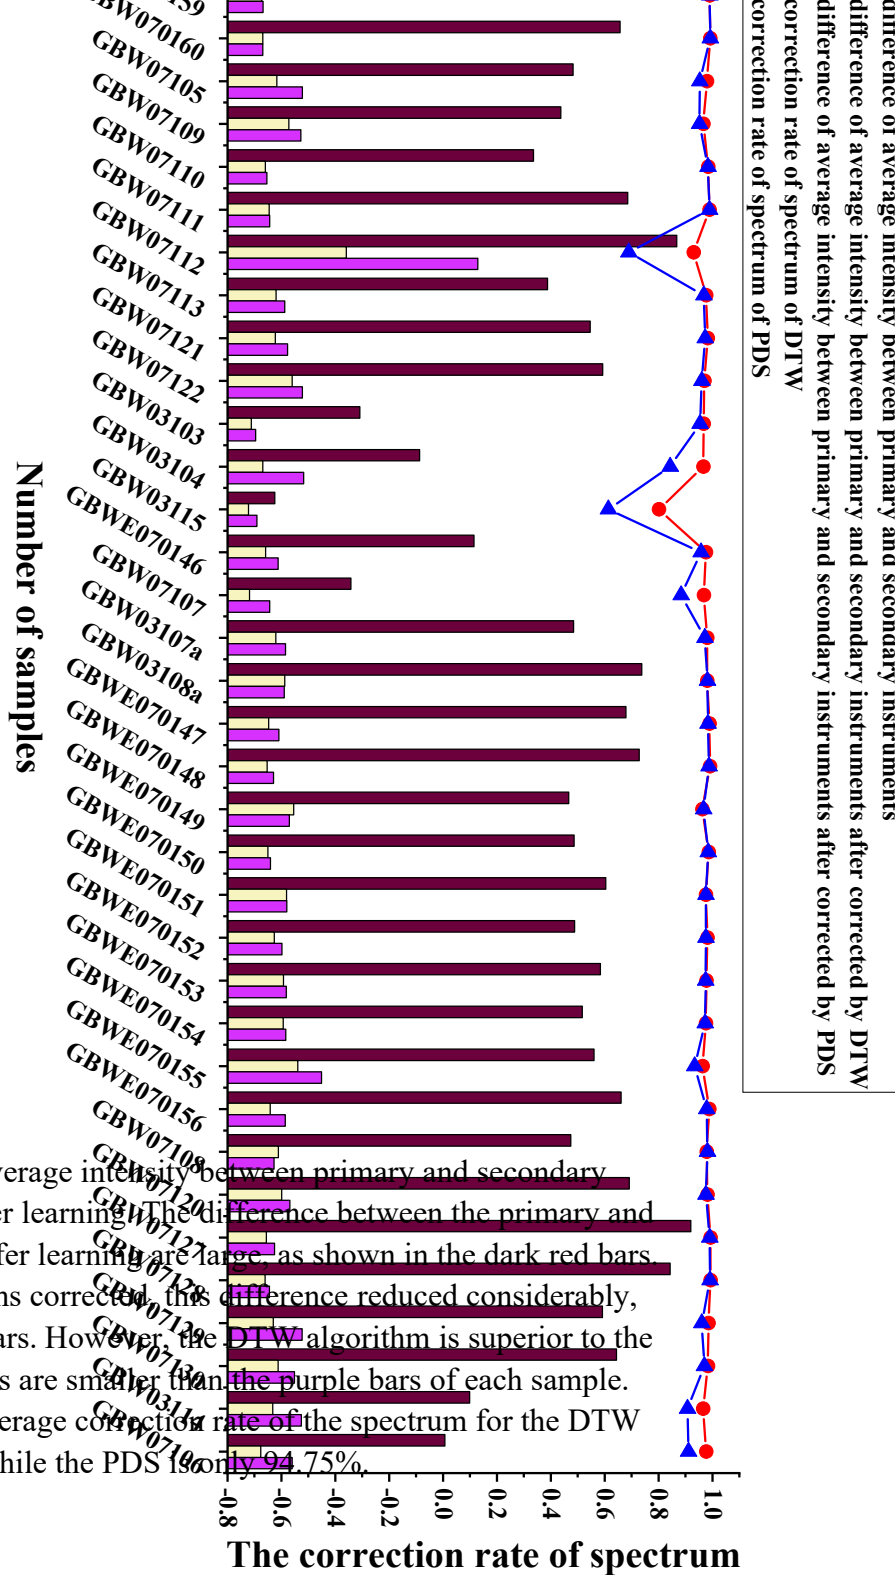

**Figure S5.** The difference of average intensity between primary and secondary instruments before and after transfer learning. The difference between the primary and secondary instruments before transfer learning are large, as shown in the dark red bars. With the DTW and PDS algorithms corrected, the difference reduced considerably, as shown in the beige and purple bars. However, the DTW algorithm is superior to the PDS algorithm, and the beige bars are smaller than the purple bars of each sample. And it can also be seen that the average correction rate of the spectrum for the DTW is 97.38%, while the PDS is only 94.75%.

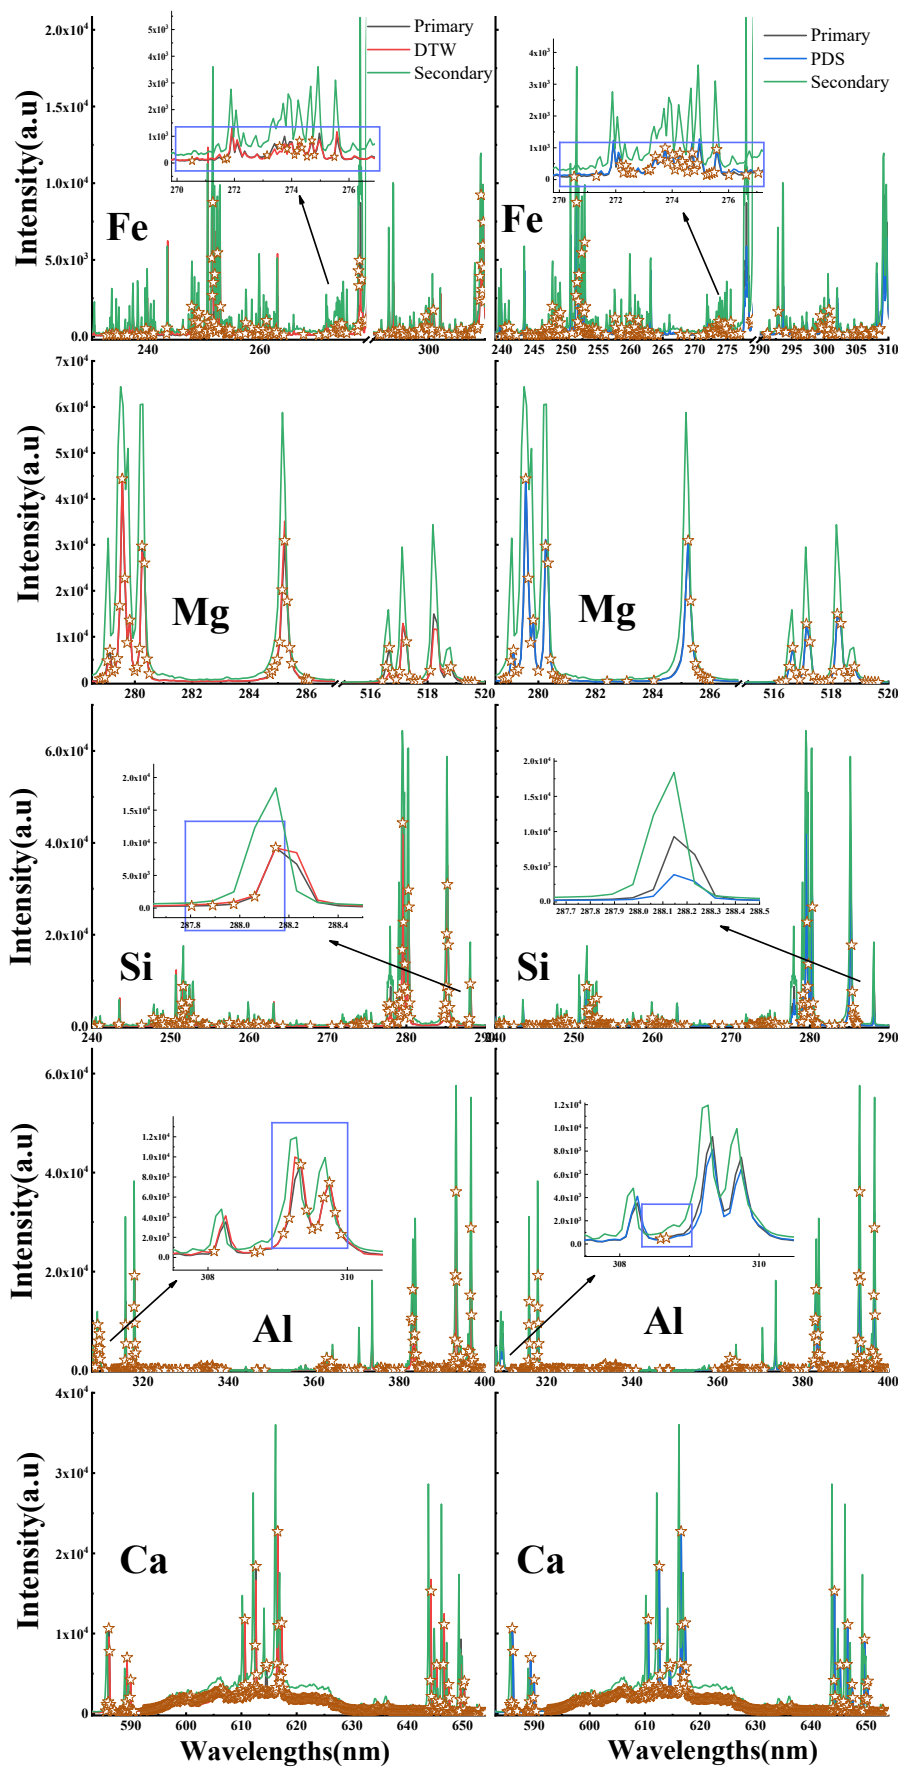

Figure S6. It shows the selection features of the major elements.
